# Supplementary material for: Addiction of High Dose of Benzodiazepine: Verona Detox Approach With Flumazenil
Source: Frontiers journal article supplement (doi:10.3389/fpsyt.2022.857376), 2022-03-31
Supplement: Data_Sheet_1.pdf [file Data_Sheet_1.pdf]

# Appendix 1

| BZDs <sup>1</sup>                                        | Half-life (hrs) <sup>2</sup><br>[active metabolite] | Approximately<br>Equivalent<br>Oral dosage (mg) <sup>3</sup> | Market aim <sup>4</sup> |
|----------------------------------------------------------|-----------------------------------------------------|--------------------------------------------------------------|-------------------------|
| Alprazolam (Xanax,<br>Frontal, Valeans,<br>Xanor, Tafil) | 6-12                                                | 0,5                                                          | a                       |
| Bromazepam (Lexotan,<br>Lexomil)                         | 10-20                                               | 5-6                                                          | a                       |
| Chlordiazepoxide<br>(Librium)                            | 5-30 [36-200]                                       | 25                                                           | a                       |
| Clobazam (Frisium) <sup>5</sup>                          | 12-60                                               | 20                                                           | a,e                     |
| Clonazepam (Rivotril,<br>Klonopin) <sup>5</sup>          | 18-50                                               | 0,5                                                          | a,e                     |
| Clorazepate (Tranxene)                                   | [36-200]                                            | 15                                                           | a                       |
| Diazepam (Valium,<br>Tranquirit, Ansiolin)               | 20-100 [36-200]                                     | 10                                                           | a                       |
| Estazolam (Esilgan,<br>ProSom, Nuctalon)                 | 10-24                                               | 1-2                                                          | h                       |
| Flunitrazepam (Roi<br>hypnol)                            | 18-26 [36-200]                                      | 1                                                            | h                       |
| Flurazepam (Felison,<br>Dalmadorm, Dalmame)              | [40-250]                                            | 15-30                                                        | h                       |
| Halazepam (Paxipam)                                      | [30-100]                                            | 20                                                           | a                       |
| Ketazolam (Anseren,<br>Anxon)                            | 30-100 [36-200]                                     | 15-30                                                        | a                       |
| Loprazolam<br>(Dormonox)                                 | 6-12                                                | 1-2                                                          | h                       |
| Lorazepam (Tavor,<br>Ativan, Temestra)                   | 10-20                                               | 1                                                            | a                       |
| Lormetazepam<br>(Minias, Noctamid)                       | 10-12                                               | 1-2                                                          | h                       |
| Medazepam (Nobrium)                                      | 36-200                                              | 10                                                           | a                       |
| Nitrazepam (Mogadon)                                     | 15-38                                               | 10                                                           | h                       |
| Nordazepam (Madar,<br>Nordaz, Calmday)                   | 36-200                                              | 10                                                           | a                       |
| Oxazepam (Serpax,<br>Serax, Serenid, Seresta)            | 4-15                                                | 20                                                           | a                       |
| Prazepam (Prazene,<br>Centrax, Lysanxia)                 | [36-200]                                            | 10-20                                                        | a                       |
| Quazepam (Doral,<br>Quazium)                             | 25-100                                              | 20                                                           | h                       |
| Temazepam                                                |                                                     |                                                              |                         |

## Appendix 1

|                                               |                  |     |   |
|-----------------------------------------------|------------------|-----|---|
| (Normison, Restoril, Euhypnos)                | 8-22             | 20  | h |
| Triazolam (Halcion)                           | 2                | 0,5 | h |
| Non-BZDs with similar effects <sup>1,6</sup>  |                  |     |   |
| Zaleplon (Sonata)                             | 2                | 20  | h |
| Zolpidem (Stilnox, Sonirem, Ambien, Stilnoct) | 2                | 20  | h |
| Zopiclone (Imovane, Zimovane)                 | 5-6              | 15  | h |
| Eszopiclone (Lunesta)                         | 6 (9 in elderly) | 3   | h |

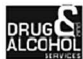

BENZODIAZEPINE WITHDRAWAL SCALE (CIWA-B) 1

## CLIENT SHEET

Surname:

Other names:

DOB:

Sex M FUR

Number:

For each of the following items, insert the number that best describes how you feel.

|                 |   |   |   |                   |
|-----------------|---|---|---|-------------------|
| 0<br>Not at all | 1 | 2 | 3 | 4<br>Very much so |
|-----------------|---|---|---|-------------------|

[illegible]

## BENZODIAZEPINE WITHDRAWAL SCALE (CIWA-B) 2

## CLINICIAN SHEET

### Clinician observations

| 18. Observe behaviour for sweating, restlessness and agitation |                                           |
|----------------------------------------------------------------|-------------------------------------------|
| 0                                                              | None, normal activity                     |
| 1                                                              |                                           |
| 2                                                              | Restless                                  |
| 3                                                              |                                           |
| 4                                                              | Paces back and forth, unable to sit still |

| 19. Observe tremor |                                     |
|--------------------|-------------------------------------|
| 0                  | No tremor                           |
| 1                  | Not visible, can be felt in fingers |
| 2                  | Visible but mild                    |
| 3                  | Moderate with arms extended         |
| 4                  | Severe, with arms not extended      |

| 20. Observe feet palms |                                                   |
|------------------------|---------------------------------------------------|
| 0                      | No sweating visible                               |
| 1                      | Barely perceptible sweating, palms moist          |
| 2                      | Palms and forehead moist, reports armpit sweating |
| 3                      | Beads of sweat on forehead                        |
| 4                      | Severe drenching sweats                           |

Surname:

**Other names:**

DOR:

Ser M EUR

Number.

[illegible]

TOTAL SCORE FOR ITEMS 1 - 20

1-20 = mild withdrawal

21-40 = moderate withdrawal

41-60 = severe withdrawal

61 - 80 = very severe withdrawal

## Brief Substance Craving Scale

Agency Name: \_\_\_\_\_

Site Name: \_\_\_\_\_

ID #: \_\_\_\_\_

Date: \_\_\_\_/\_\_\_\_/\_\_\_\_

### STAFF USE ONLY

A. Identify the primary substance dependence for which the participant is being treated at this clinic.

Downers or Sedatives (Barbiturates, etc.) ☐ 1Benzos (Valium, Xanax, etc.) ☐ 2Hallucinogens (including ecstasy) ☐ 3Alcohol ☐ 4Heroin or other Opiates (Morphine, etc.) ☐ 5Marijuana ☐ 6Stimulants (cocaine, amphetamine) ☐ 7Other (specify): \_\_\_\_\_ ☐ 8Please answer the following questions with regard to your craving for the primary drug.

1. The INTENSITY of my craving, that is, how much I desired this drug in the past 24 hours was:

None at all ☐ 0Slight ☐ 1Moderate ☐ 2Considerable ☐ 3Extreme ☐ 4

2. The FREQUENCY of my craving, that is, how often I desired this drug in the past 24 hours was:

Never ☐ 0Almost never ☐ 1Several times ☐ 2Regularly ☐ 3Almost constantly ☐ 4

3. The LENGTH of time I spent in craving this drug during the past 24 hours was:

None at all ☐ 0Very short ☐ 1Short ☐ 2Somewhat long ☐ 3Very long ☐ 4

4. Write in the NUMBER of times you think you had craving for this drug during the past 24 hours.

\_\_\_\_\_

**B. A second craved substance during the past 24 hours was:***Choose only ONE from the following. If NONE, please do not answer Questions 5-8.*None (STOP) ☐ 0Downers or Sedatives (Barbiturates, etc.) ☐ 1Benzos (Valium, Xanax, etc.) ☐ 2Hallucinogens (including ecstasy) ☐ 3Alcohol ☐ 4Heroin or other Opiates (Morphine, etc.) ☐ 5Marijuana ☐ 6Stimulants (cocaine, amphetamine) ☐ 7Other (specify): \_\_\_\_\_ ☐ 8**Please answer the following questions with regard to a second craved drug.****5. The INTENSITY of my craving, that is, how much I desired this drug in the past 24 hours was:**None at all ☐ 0Slight ☐ 1Moderate ☐ 2Considerable ☐ 3Extreme ☐ 4**6. The FREQUENCY of my craving, that is, how often I desired this drug in the past 24 hours was:**Never ☐ 0Almost never ☐ 1Several times ☐ 2Regularly ☐ 3Almost constantly ☐ 4**7. The LENGTH of time I spent in craving this drug during the past 24 hours was:**None at all ☐ 0Very short ☐ 1Short ☐ 2Somewhat long ☐ 3Very long ☐ 4**8. Write in the NUMBER of times you think you had craving for this drug during the past 24 hours.**

\_\_\_\_\_

Reference: Somoza, E., Dyrenforth, S., Goldsmith, J., Mezinskis, J., & Cohen, M., 1995. In search of a universal drug craving scale. Paper presented at the Annual Meeting of the American Psychiatric Association, Miami Florida.

# First aid for epileptic seizures

Remember

## ACTION

for tonic-clonic seizures:

**A**

### Assess

Assess the situation – are they in danger of injuring themselves? Remove any nearby objects that could cause injury

**C**

### Cushion

Cushion their head (with a jumper, for example) to protect them from head injury

**T**

### Time

Check the time – if the jerking lasts longer than five minutes you should call an ambulance

**I**

### Identity

Look for a medical bracelet or ID card – it may give you information about the person's seizures and what to do

**O**

### Over

Once the jerking has stopped, put them on their side. Stay with them and reassure them as they come round

**N**

### Never

Never restrain the person, put something in their mouth or try to give them food or drink

### Tonic-clonic seizures

(used to be called 'grand mal')

The person goes stiff, loses consciousness, falls to the floor and begins to jerk or convulse. They may look a little blue around their mouth from irregular breathing. Tonic-clonic seizures can last a few minutes. A tonic-clonic seizure is the seizure you are most likely to come across. There are many others. Visit [epilepsy.org.uk](http://epilepsy.org.uk) to find out more.

### Call an ambulance if:

- You know it is a person's first seizure **or**
- The seizure lasts for more than five minutes **or**
- One seizure appears to follow another without the person gaining consciousness in between **or**
- The person is injured **or**
- You believe the person needs urgent medical attention

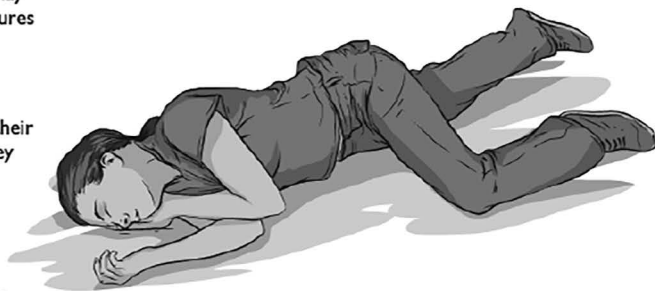

#### Epilepsy Action

New Anstey House, Gate Way Drive, Yeadon, Leeds LS19 7XY  
tel. 0113 210 8800 email [epilepsy@epilepsy.org.uk](mailto:epilepsy@epilepsy.org.uk) [epilepsy.org.uk](http://epilepsy.org.uk)  
Epilepsy Action Helpline: freephone 0800 800 5050 text 07797 805 390  
email [helpline@epilepsy.org.uk](mailto:helpline@epilepsy.org.uk) twitter [@epilepsyadvice](https://twitter.com/epilepsyadvice)

Epilepsy Action is a working name of British Epilepsy Association. A company limited by guarantee (registered in England No. 797997)  
Registered charity in England (No. 234343)

B148B.02

Date: July 2015

Reprinted: May 2016

Due for review: July 2018

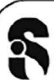

Health & care  
information  
you can trust

The Information Standard

Certified  
Member
